# Supplementary material
Source: Frontiers journal article supplement (https://www.frontiersin.org/articles/461568)
Supplement: Table_3.xlsx [file Table_3.xlsx]

## Sheet: Table S3
Supplemental Data Table S3: Description of the selected 3D surface texture parameters.
Group	Parameter	Unit	Name	Description
ISO 25178	Sq	µm	Root-mean-square height	Standard deviation of the height distribution or of the amplitudes of the surface.
ISO 25178	Sp	µm	Maximum peak height	Height between the highest peak and the mean plane.
ISO 25178	S5p	µm	Five point peak height	Average value of the heights of the five peaks with the largest height.
ISO 25178	S5v	µm	Five point pit height	Average value of the five deepest pits, within the definition area.
ISO 25178	Sha	µm²	Closed hill area	Average area of hills connected to the edge.
ISO 25178	Sda	µm²	Closed dale area	Average area of dales connected to the edge.
ISO 25178	Spd	1/µm²	Density of peaks	Number of peaks per unit area.
ISO 25178	Vv	µm³/µm²	Void volume	Volume of the voids at a material ratio p (10%).
ISO 25178	Vvc	µm³/µm²	Core void volume	Volume of void of the core, between the material ratios p (10%) and q (80%).
ISO 25178	Vmp	µm³/µm²	Peak material volume	Volume of material in the peaks, between 0% material ratio and a material ratio p (10%).
ISO 25178	Sdr	%	Developed interfacial area ratio	Ratio of the increment of the interfacial area of the scale limited surface within the definition area. A completely flat surface will have a Sdr near 0%. A complex surface will have a Sdr of some percent.
ISO 25178	Str	no unit	Texture aspect ratio	Ratio of the horizontal distance of the autocorrelation function. If the value is near 1, the surface is isotropic. If the value is near 0, the surface is anisotropic.
ISO 25178	Sal	µm	Autocorrelation length	This parameter expresses the content in wavelengths of the surface. A high value indicates that the surface has mainly high wavelengths (low frequencies).
ISO 25178	Sdq	no unit	Root-mean-square gradient	Root-Mean-Square slope of the surface. High values indicate a steep slope.
ISO 25178	Smc	µm	Inverse areal material ratio	Height c at which a given areal material ratio p (10%) is satisfied. The height is calculated from the mean plane.
ISO 25178	Smr	%	Areal material ratio	Ratio of the area of the material at a specified height (1µm under the mean plane) to the evaluation area.
ISO 25178	Std	°	Texture direction	This parameter calculates the main angle for the texture of the surface. This parameter has a meaning if Str is lower than 0.5.
ISO 12781	FLTv	µm	Reference-to-valley flatness deviation	Flatness deviation from the mean plane to the valleys.
ISO 12781	FLTp	µm	Peak-to-reference flatness deviation	Flatness deviation from the mean plane to the peaks.
Motif	mea	µm²	Area of hill motifs	Horizontal area enclosed inside the course line.
Motif	mev	µm³	Mean volume of hill motifs	Material volume of the motif, above the highest saddle point.
Motif	meh	µm	Mean height of peaks	Mean height between the highest saddle point and the peak.
Furrow	madf	µm	Maximum depth of furrows	Maximum depth of furrows.
Furrow	metf	µm	Mean depth of furrows	Mean depth of all furrows contained by the surface.
Furrow	medf	cm/cm²	Mean density of furrows	Mean density of all furrows contained by the surface.
ISO after ISO 12781-1 (2011) and ISO 25178-2 (2012).
